# Supplementary material for: Associations between Coping Strategies and Cyberhate Involvement: Evidence from Adolescents across Three World Regions
Source: MDPI journal article supplement (doi:10.3390/ijerph19116749), 2022-05-31
Supplement: s1 [file s1]

Table S1  
*Coefficient Alpha of the Coping Strategy Subscales for each Country separately*

| Coping strategies        | Cyprus   | Germany  | Greece   | India    | South Korea | Spain    | Thailand | U.S.     |
|--------------------------|----------|----------|----------|----------|-------------|----------|----------|----------|
|                          | $\alpha$ | $\alpha$ | $\alpha$ | $\alpha$ | $\alpha$    | $\alpha$ | $\alpha$ | $\alpha$ |
| Distal advice            | .76      | .70      | .73      | .79      | .82         | .78      | .91      | .78      |
| Close support            | .84      | .85      | .83      | .84      | .79         | .78      | .92      | .85      |
| Assertiveness            | .92      | .91      | .88      | .90      | .81         | .86      | .95      | .75      |
| Technical coping         | .81      | .83      | .75      | .78      | .69         | .74      | .82      | .72      |
| Helplessness/ Self-blame | .88      | .85      | .82      | .76      | .69         | .80      | .88      | .78      |
| Retaliation              | .88      | .85      | .87      | .73      | .68         | .63      | .85      | .76      |

*Note.* Cyprus,  $n = 219$ ; Germany,  $n = 1,418$ ; Greece,  $n = 670$ ; India,  $n = 1,119$ ; South Korea,  $n = 755$ ; Spain,  $n = 1,010$ ; Thailand,  $n = 707$ ; U.S.,  $n = 845$ .

Table S2  
*Descriptive Statistics and Correlations among Main Study Variables for each Country separately*

| Country |                             | M    | SD   | 1.     | 2.     | 3.     | 4.     | 5.    | 6.    | 7.    | 8. |
|---------|-----------------------------|------|------|--------|--------|--------|--------|-------|-------|-------|----|
| Cyprus  | 1. Victimization            | 0.16 | 0.56 | –      |        |        |        |       |       |       |    |
|         | 2. Perpetration             | 0.05 | 0.28 | .29**  | –      |        |        |       |       |       |    |
|         | 3. Distal advice            | 1.40 | 0.97 | .01    | -.04   | –      |        |       |       |       |    |
|         | 4. Close support            | 2.21 | 0.92 | .04    | .01    | .45**  | –      |       |       |       |    |
|         | 5. Assertiveness            | 2.05 | 1.05 | .10*   | .04    | .31**  | .39**  | –     |       |       |    |
|         | 6. Technical coping         | 2.50 | 0.85 | -.02   | .06    | .44**  | .64**  | .48** | –     |       |    |
|         | 7. Helplessness/ Self-blame | 1.03 | 1.02 | .18**  | .09*   | .40**  | .33**  | .27** | .27** | –     |    |
|         | 8. Retaliation              | 0.73 | 0.90 | .24**  | .17**  | .14*   | .11*   | .27** | .17   | .26** | –  |
| Germany |                             | M    | SD   | 1.     | 2.     | 3.     | 4.     | 5.    | 6.    | 7.    | 8. |
|         | 1. Victimization            | 0.29 | 0.74 | –      |        |        |        |       |       |       |    |
|         | 2. Perpetration             | 0.19 | 0.62 | .32**  | –      |        |        |       |       |       |    |
|         | 3. Distal advice            | 0.73 | 0.76 | -.06*  | -.09*  | –      |        |       |       |       |    |
|         | 4. Close support            | 1.58 | 1.05 | -.07** | -.12** | -.43** | –      |       |       |       |    |
|         | 5. Assertiveness            | 1.77 | 1.07 | -.06*  | -.14** | -.32** | .57**  | –     |       |       |    |
|         | 6. Technical coping         | 1.92 | 1.08 | -.02   | -.13** | .34**  | -.65** | .59** | –     |       |    |
|         | 7. Helplessness/ Self-blame | 0.75 | 0.89 | .03    | -.01   | -.39** | .45**  | .35** | .35** | –     |    |
|         | 8. Retaliation              | 0.76 | 0.94 | .10**  | .11**  | .06*   | .16**  | .16** | .24** | .18** | –  |
| Greece  |                             | M    | SD   | 1.     | 2.     | 3.     | 4.     | 5.    | 6.    | 7.    | 8. |
|         | 1. Victimization            | 0.26 | 0.72 | –      |        |        |        |       |       |       |    |

|             |                             |      |      |       |        |        |       |       |       |       |    |
|-------------|-----------------------------|------|------|-------|--------|--------|-------|-------|-------|-------|----|
|             | 2. Perpetration             | 0.19 | 0.63 | .39** | –      |        |       |       |       |       |    |
|             | 3. Distal advice            | 0.97 | 0.87 | -.01  | -.06   | –      |       |       |       |       |    |
|             | 4. Close support            | 2.18 | 0.93 | -.08* | -.15** | .34**  | –     |       |       |       |    |
|             | 5. Assertiveness            | 2.06 | 1.01 | .07   | -.06   | .23**  | .44** |       |       |       |    |
|             | 6. Technical coping         | 2.44 | 0.82 | -.02  | -.12** | .32**  | .52** | .48** | –     |       |    |
|             | 7. Helplessness/ Self-blame | 0.64 | 0.84 | .05   | .01    | .16**  | .24** | .18** | .13** | –     |    |
|             | 8. Retaliation              | 0.85 | 0.97 | .10** | .21**  | -.10** | -.09* | -.03  | -.03  | -.01  | –  |
| India       |                             | M    | SD   | 1.    | 2.     | 3.     | 4.    | 5.    | 6.    | 7.    | 8. |
|             | 1. Victimization            | 0.25 | 0.71 | –     |        |        |       |       |       |       |    |
|             | 2. Perpetration             | 0.24 | 0.63 | .28** | –      |        |       |       |       |       |    |
|             | 3. Distal advice            | 0.84 | 0.88 | .09** | .09**  | –      |       |       |       |       |    |
|             | 4. Close support            | 1.56 | 1.11 | .13** | .16**  | .55**  | –     |       |       |       |    |
|             | 5. Assertiveness            | 1.58 | 1.23 | .12** | .16**  | .61**  | .70** | –     |       |       |    |
|             | 6. Technical coping         | 1.55 | 1.14 | .14** | .11**  | .59**  | .79** | .70** | –     |       |    |
|             | 7. Helplessness/ Self-blame | 1.16 | 1.01 | .12** | .15**  | .58**  | .66** | .73** | .63** | –     |    |
|             | 8. Retaliation              | 1.08 | 1.01 | .13** | .14**  | .46**  | .66** | .54** | .57** | .53** | –  |
| South Korea |                             | M    | SD   | 1.    | 2.     | 3.     | 4.    | 5.    | 6.    | 7.    | 8. |
|             | 1. Victimization            | 0.14 | 0.49 | –     |        |        |       |       |       |       |    |
|             | 2. Perpetration             | 0.07 | 0.36 | .22** | –      |        |       |       |       |       |    |
|             | 3. Distal advice            | 1.61 | 0.95 | -.07* | -.06   | –      |       |       |       |       |    |
|             | 4. Close support            | 1.78 | 0.87 | -.04  | -.01   | .44**  | –     |       |       |       |    |
|             | 5. Assertiveness            | 1.97 | 0.87 | -.03  | -.05   | .47**  | .51** | –     |       |       |    |
|             | 6. Technical coping         | 2.17 | 0.82 | -.06  | -.03   | .50**  | .56** | .57** | –     |       |    |
|             | 7. Helplessness/ Self-blame | 0.92 | 0.77 | -.01  | .04    | .28**  | .40** | .37** | .30** | –     |    |

|          |                             | 0.99 | 0.79 | .01    | .08*   | .26** | .36** | .35** | .30** | .37** | –  |
|----------|-----------------------------|------|------|--------|--------|-------|-------|-------|-------|-------|----|
| Spain    |                             | M    | SD   | 1.     | 2.     | 3.    | 4.    | 5.    | 6.    | 7.    | 8. |
|          | 8. Retaliation              | 0.28 | 0.69 | –      |        |       |       |       |       |       |    |
|          | 1. Victimization            | 0.12 | 0.49 | .17**  | –      |       |       |       |       |       |    |
|          | 2. Perpetration             | 1.36 | 0.96 | -.14** | -.11** | –     |       |       |       |       |    |
|          | 3. Distal advice            | 2.26 | 0.84 | -.08*  | -.10** | .42** | –     |       |       |       |    |
|          | 4. Close support            | 2.33 | 0.86 | -.07*  | -.13** | .29** | .48** | –     |       |       |    |
|          | 5. Assertiveness            | 2.45 | 0.81 | -.05   | -.17** | .34** | .56** | .56** | –     |       |    |
|          | 6. Technical coping         | 1.05 | 0.93 | -.01   | -.06   | .26   | .34   | .19** | .24** | –     |    |
|          | 7. Helplessness/ Self-blame | 1.07 | 0.84 | .04    | .09**  | .04   | .18** | .25** | .19** | .16** | –  |
|          | 8. Retaliation              |      |      |        |        |       |       |       |       |       |    |
| Thailand |                             | M    | SD   | 1.     | 2.     | 3.    | 4.    | 5.    | 6.    | 7.    | 8. |
|          | 1. Victimization            | 0.55 | 0.85 | –      |        |       |       |       |       |       |    |
|          | 2. Perpetration             | 0.47 | 0.77 | .53**  | –      |       |       |       |       |       |    |
|          | 3. Distal advice            | 1.05 | 1.02 | .05*   | -.01   | –     |       |       |       |       |    |
|          | 4. Close support            | 1.34 | 1.13 | .14**  | .02    | .60** | –     |       |       |       |    |
|          | 5. Assertiveness            | 1.46 | 1.21 | .14**  | .02    | .65** | .80** | –     |       |       |    |
|          | 6. Technical coping         | 1.25 | 1.09 | .15**  | .05    | .59** | .79** | .76** | –     |       |    |
|          | 7. Helplessness/ Self-blame | 0.93 | 1.01 | .14**  | .03    | .59** | .69** | .61** | .64** | –     |    |
|          | 8. Retaliation              | 0.68 | 0.89 | .22**  | .19**  | .36** | .38** | .36** | .45** | .45** | –  |
| U.S.     |                             | M    | SD   | 1.     | 2.     | 3.    | 4.    | 5.    | 6.    | 7.    | 8. |
|          | 1. Victimization            | 0.61 | 0.96 | –      |        |       |       |       |       |       |    |
|          | 2. Perpetration             | 0.34 | 0.70 | .45**  | –      |       |       |       |       |       |    |
|          | 3. Distal advice            | 1.83 | 1.05 | -.15** | -.10** | –     |       |       |       |       |    |
|          | 4. Close support            | 1.65 | 0.86 | .01    | .01    | .06   | –     |       |       |       |    |

---

|                             |      |      |       |       |        |       |       |       |       |
|-----------------------------|------|------|-------|-------|--------|-------|-------|-------|-------|
| 5. Assertiveness            | 1.87 | 0.91 | -.04  | -.03  | .41**  | .14** | –     |       |       |
| 6. Technical coping         | 0.68 | 0.84 | .10*  | .10** | -.03   | .35** | .01   | –     |       |
| 7. Helplessness/ Self-blame | 1.05 | 0.90 | .08*  | .09*  | .16**  | .21** | .37** | .24** | –     |
| 8. Retaliation              | 1.09 | 0.99 | .13** | .11** | -.10** | .61** | .01   | .40** | .09** |

---

*Note.* Cyprus,  $n = 210$ ; Germany,  $n = 1,385$ ; Greece,  $n = 659$ ; India,  $n = 1,118$ ; South Korea,  $n = 745$ ; Spain,  $n = 993$ ; Thailand,  $n = 607$ ; U.S.,  $n = 845$ . \*\* Correlation is significant at the 0.01 level (2-tailed). \* Correlation is significant at the 0.05 level (2-tailed).

Table S3  
*Cyberhate Involvement by Country*

| Cyberhate Involvement | Cyprus |     | Germany |      | Greece |     | India |     | South Korea |     | Spain |     | Thailand |     | U.S. |     |
|-----------------------|--------|-----|---------|------|--------|-----|-------|-----|-------------|-----|-------|-----|----------|-----|------|-----|
|                       | %      | n   | %       | n    | %      | n   | %     | n   | %           | n   | %     | n   | %        | n   | %    | n   |
| Victim                | 8.3    | 18  | 11.7    | 165  | 9.7    | 65  | 8.4   | 94  | 7           | 53  | 14.2  | 143 | 12.4     | 88  | 18.2 | 154 |
| Perpetrator           | 2.8    | 6   | 6       | 85   | 5.8    | 39  | 9.5   | 106 | 2.6         | 20  | 4.1   | 41  | 8.2      | 58  | 6.4  | 54  |
| Victim-Perpetrator    | 1.8    | 4   | 5.3     | 75   | 5.2    | 35  | 5.7   | 64  | 1.6         | 12  | 3.5   | 35  | 24       | 170 | 18.1 | 153 |
| Non-involved          | 87.1   | 189 | 77      | 1090 | 79.2   | 530 | 76.4  | 854 | 88.7        | 670 | 78.3  | 788 | 55.4     | 393 | 57.3 | 484 |

*Note.* Cyprus,  $n = 217$ ; Germany,  $n = 1,415$ ; Greece,  $n = 669$ ; India,  $n = 1,118$ ; South Korea,  $n = 755$ ; Spain,  $n = 1,007$ ; Thailand,  $n = 709$ ; U.S.,  $n = 845$ .
